# Supplementary material for: Two New Acylated Flavonol Glycosides from the Seeds of Lepidium sativum
Source: PubMed Central journal article supplement (PMC6271768; doi:10.3390/molecules190811341), 2014-07-31

# Supplementary Materials

Figure S1.  $^1\text{H-NMR}$  spectrum of compound **1** at 600 MHz in  $\text{DMSO-}d_6$ .

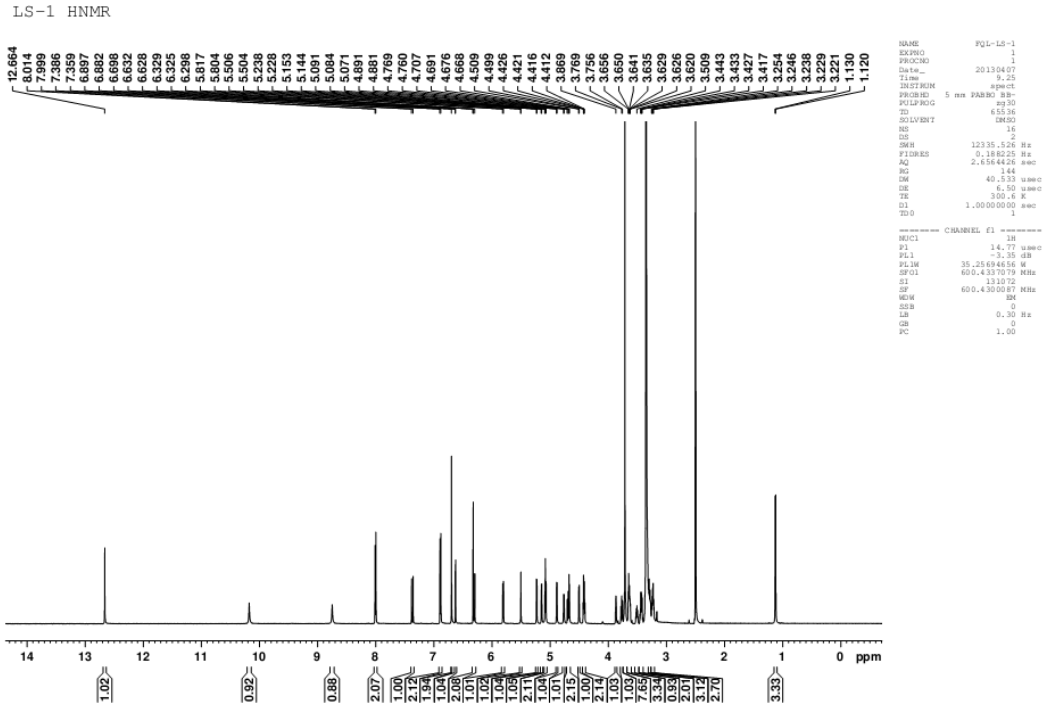

Figure S2.  $^{13}\text{C-APT}$  spectrum of compound **1** at 150 MHz in  $\text{DMSO-}d_6$ .

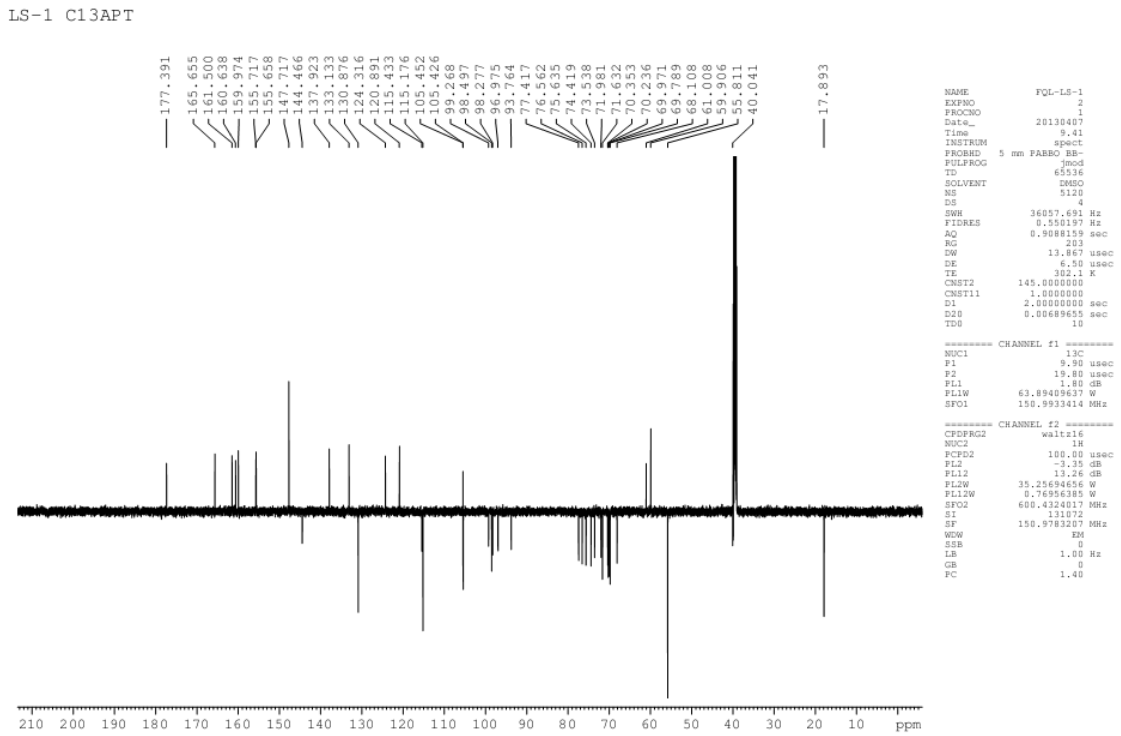

Figure S3. HSQC spectrum of compound 1 at 600 MHz in DMSO-d<sub>6</sub>.

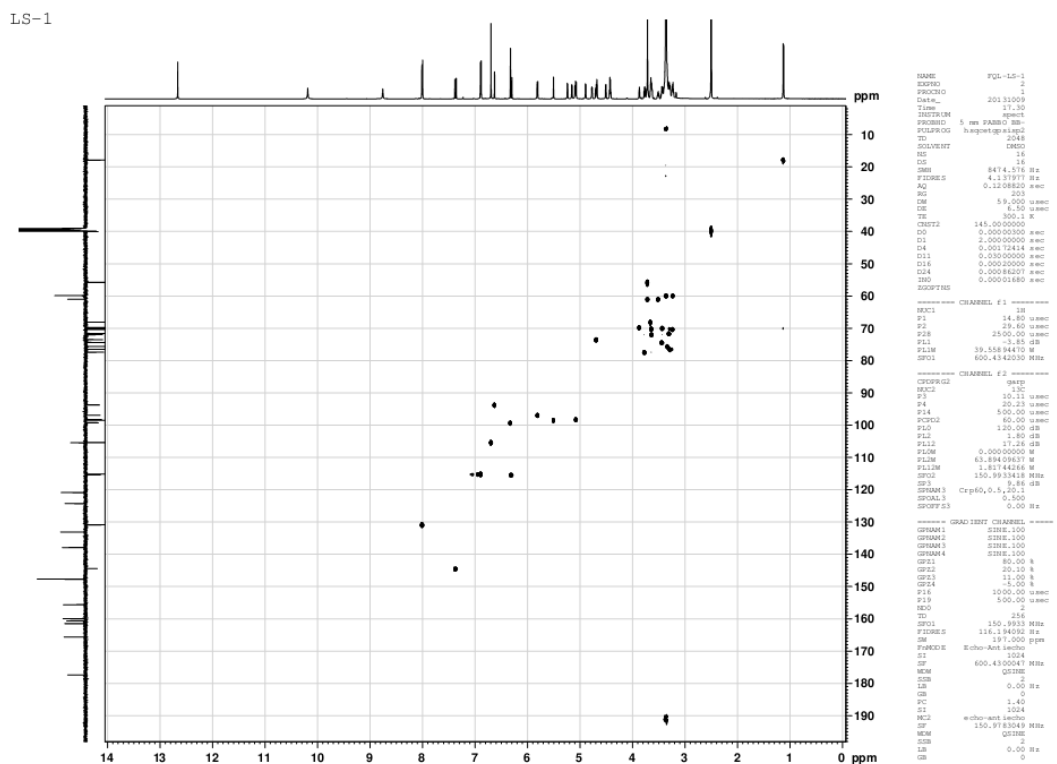

Figure S4. HMBC spectrum of compound 1 at 600 MHz in DMSO-d<sub>6</sub>.

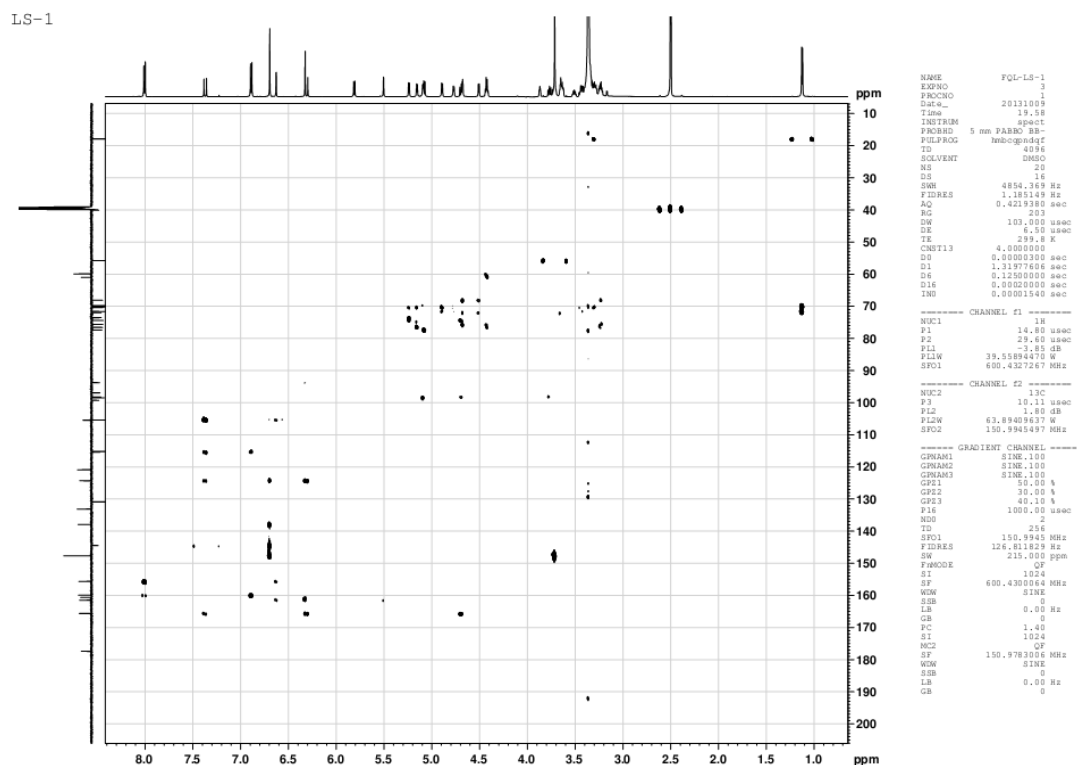

**Figure S5.** TOCSY spectrum of compound **1** at 600 MHz in DMSO-*d*<sub>6</sub>.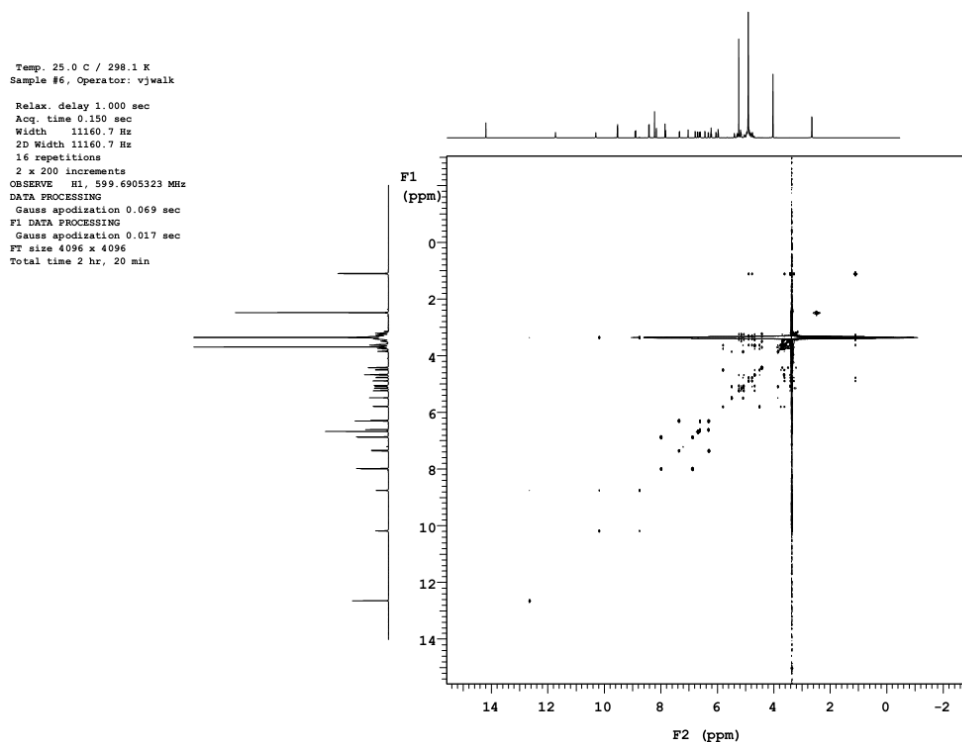**Figure S6.** The HR-MS of compound **1**.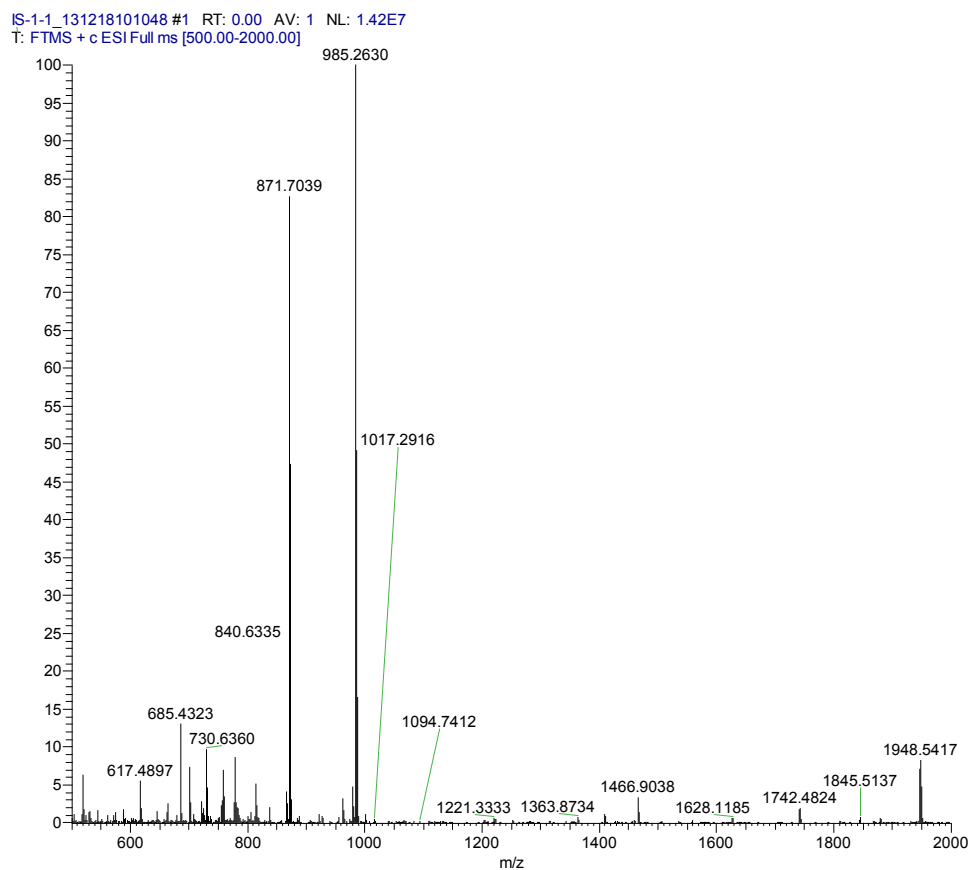

Figure S7.  $^1\text{H-NMR}$  spectrum of compound **2** at 600 MHz in  $\text{DMSO-}d_6$ .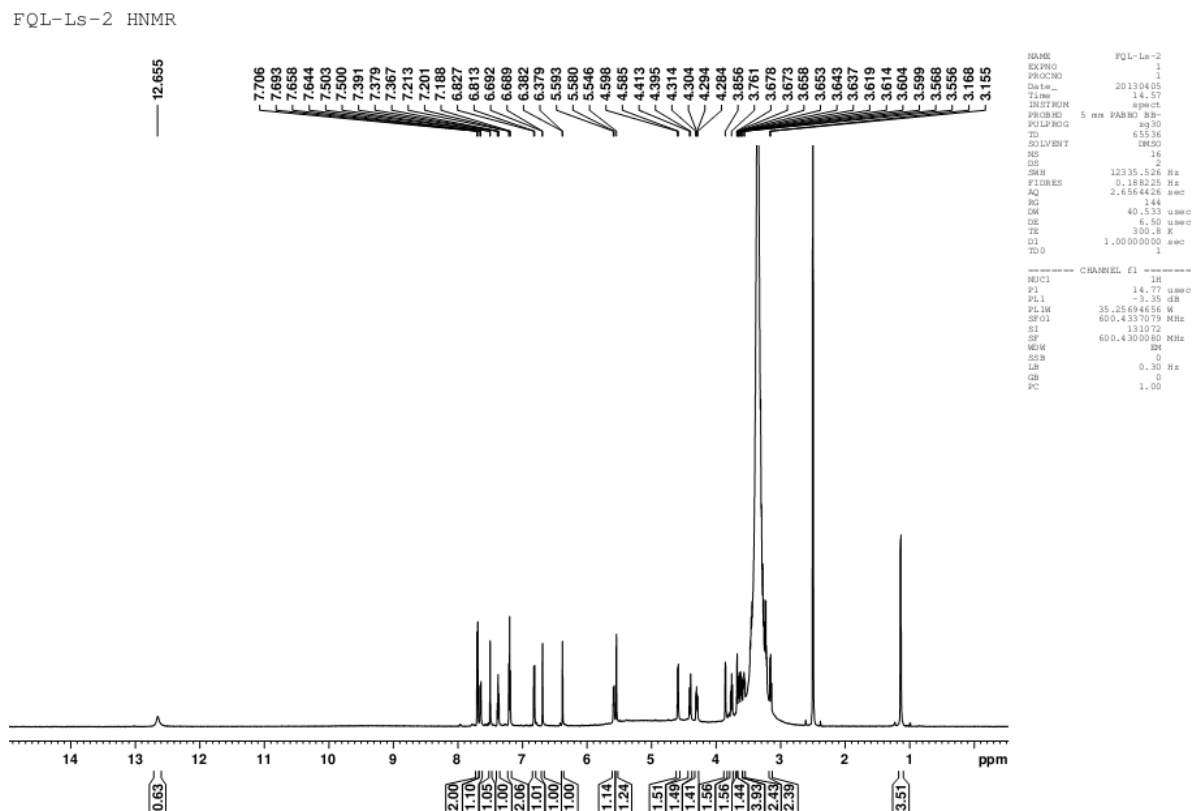Figure S8.  $^{13}\text{C-APT}$  spectrum of compound **2** at 150 MHz in  $\text{DMSO-}d_6$ .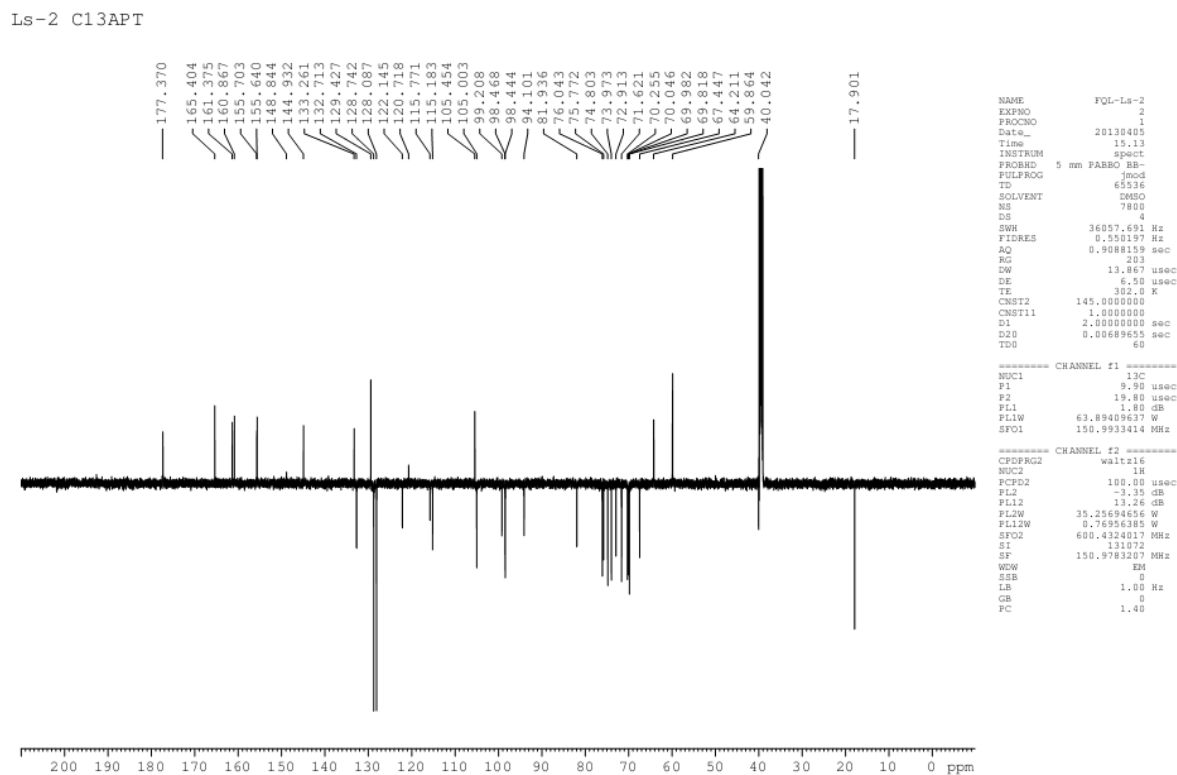

Figure S9. HSQC spectrum of compound 2 at 600 MHz in DMSO-d<sub>6</sub>.

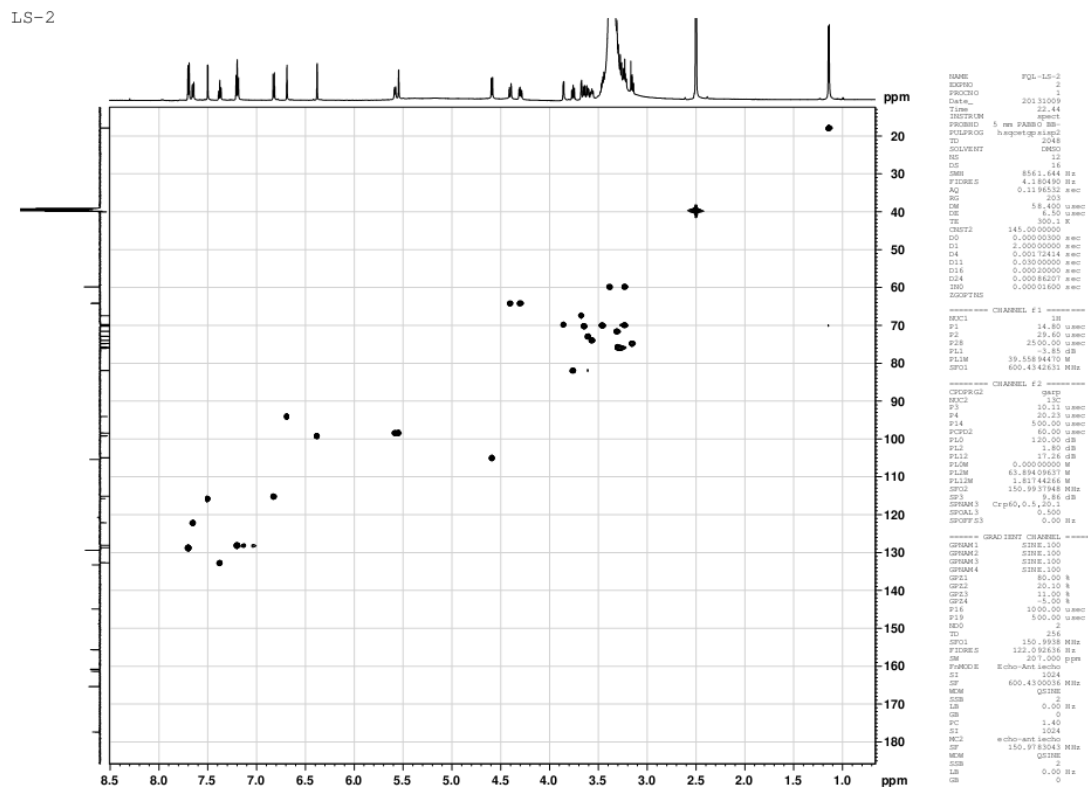

Figure S10. HMBC spectrum of compound 2 at 600 MHz in DMSO-d<sub>6</sub>.

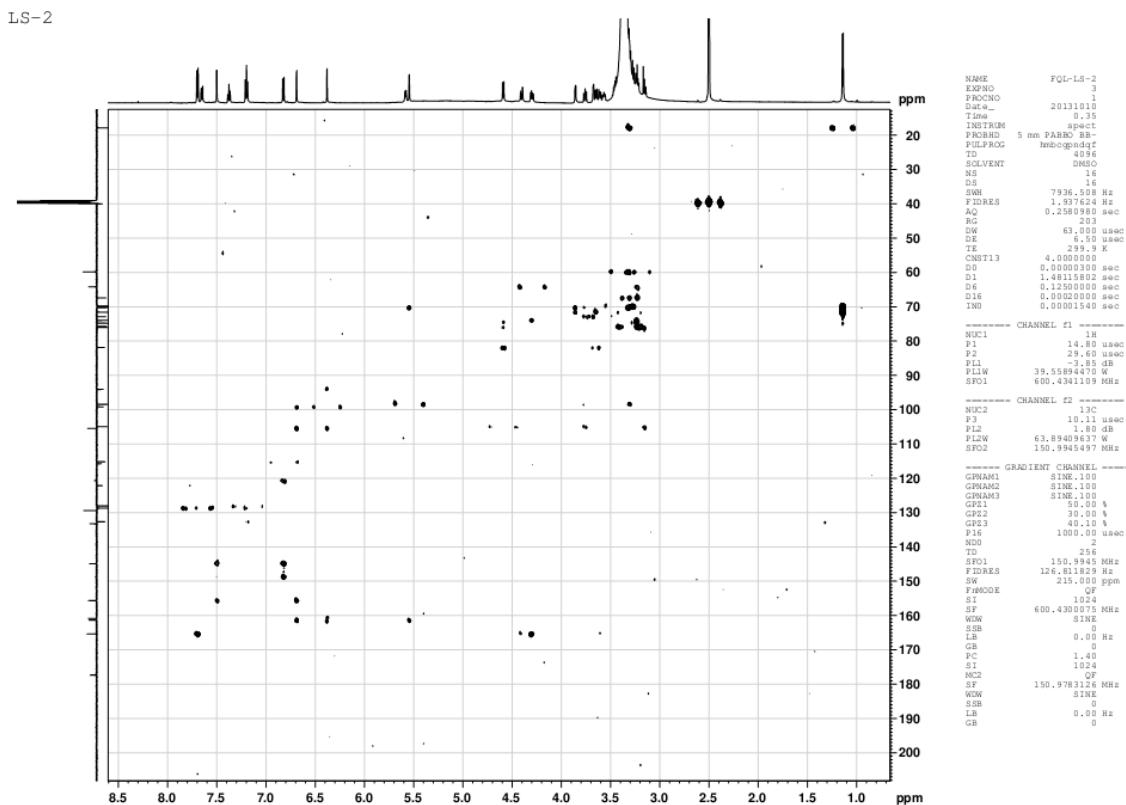

**Figure S11.** TOCSY spectrum of compound **2** at 600 MHz in DMSO-*d*<sub>6</sub>.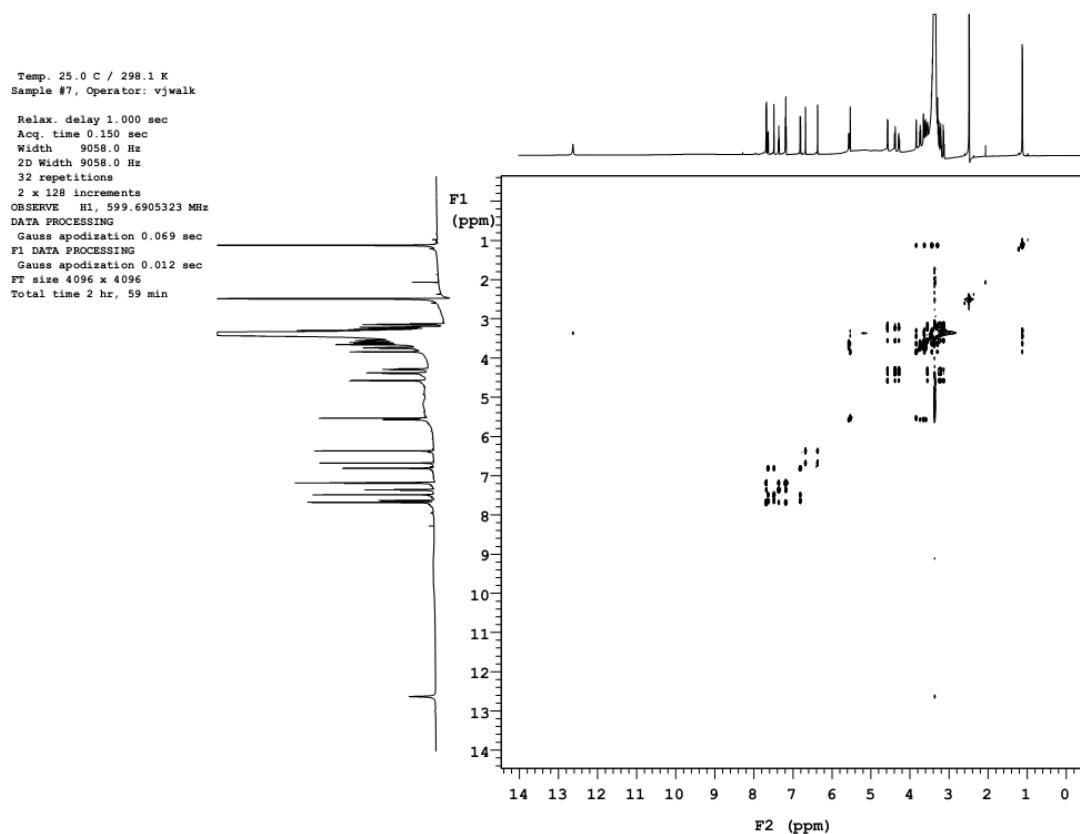**Figure S12.** The HR-MS of compound **2**.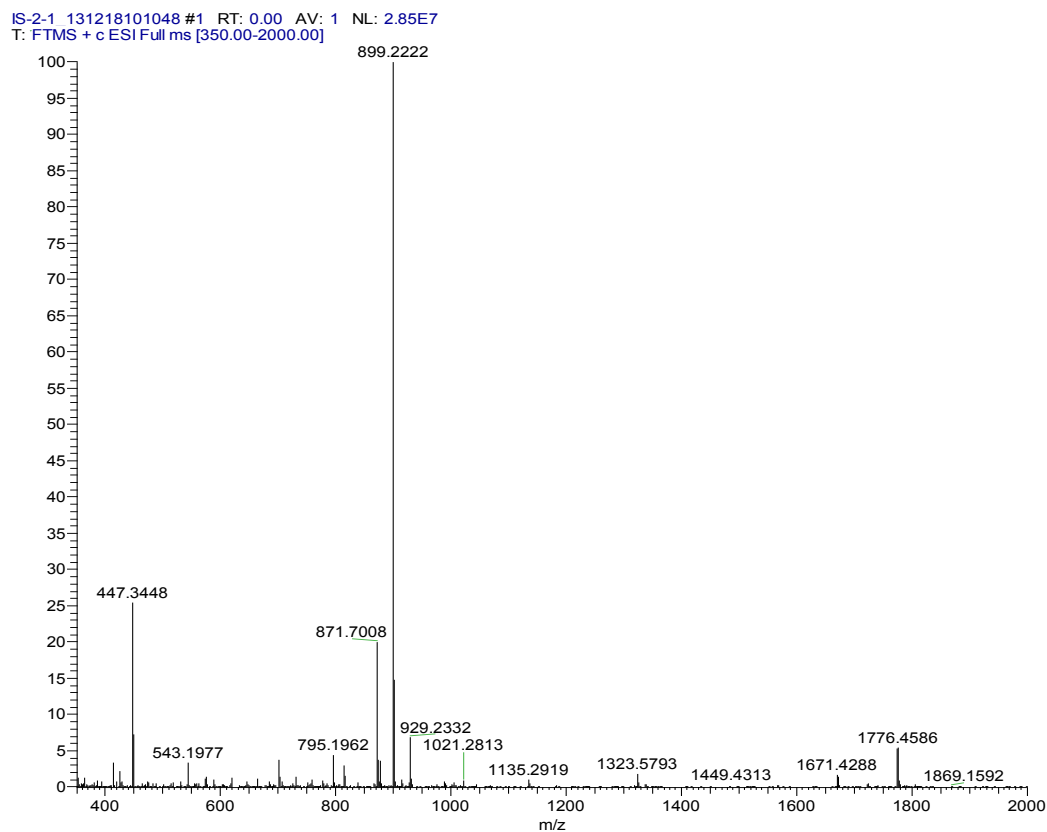

Supplement: molecules-19-11341-s001.pdf [file molecules-19-11341-s001.pdf]
